# Supplementary material for: Decreased domain size of p-DTS(FBTTh2)2/P(NDI2OD-T2) blend films due to their different solution aggregation behavior at different temperatures
Source: Royal Society of Chemistry journal article supplement (doi:10.1039/c7cp07084e), 2017-01-01
Supplement: c7cp07084e1.pdf [file c7cp07084e1.pdf]

Supporting information

**Decreased Domain Size of  $p$ -DTS(FBTTh<sub>2</sub>)<sub>2</sub>/P(NDI2OD-T2)  
Blend Films by Their Different Solution Aggregation  
Behavior with Temperature**

Ke Zhou, Qiaoqiao Zhao, Rui Zhang, Xinxu Cao, Xinhong Yu,

Jiangang Liu\* and Yanchun Han\*

State Key Laboratory of Polymer Physics and Chemistry, Changchun Institute of  
Applied Chemistry, Chinese Academy of Sciences, 5625 Renmin Street, Changchun  
130022, P. R. China;

Tel: 86-431-85262175, Fax: 86-431-85262126, Email: niitawh@ciac.ac.cn

ychan@ciac.ac.cn

\* To whom correspondence should be addressed

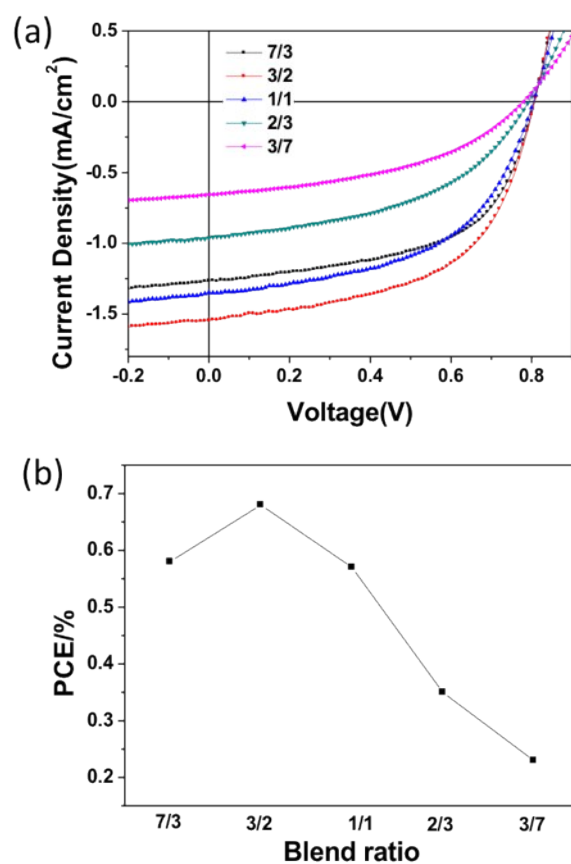

Figure S1 (a) J-V curves and (b) the summary of power conversion efficiency of *p*-DTS(FBTTh<sub>2</sub>)<sub>2</sub>/P(NDI2OD-T2) devices with various blend ratios.

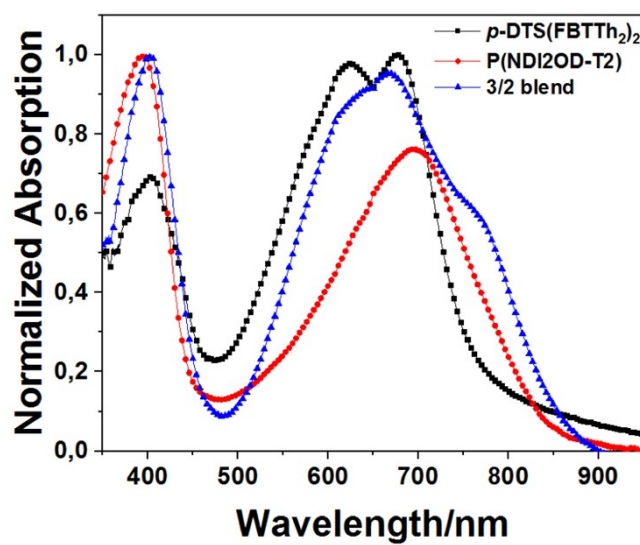

Figure S2 Normalized UV absorption spectra of neat P(NDI2OD-T2), *p*-DTS(FBTTh<sub>2</sub>)<sub>2</sub>, and 3/2 blend films.

Table S1 the photovoltaic data of *p*-DTS(FBTTh<sub>2</sub>)<sub>2</sub>/P(NDI2OD-T2) devices with various blend ratios.

| Blend ratio | V <sub>oc</sub> /V | J <sub>sc</sub> /mA*cm <sup>-2</sup> | FF   | PCE/% | Max/Average |
|-------------|--------------------|--------------------------------------|------|-------|-------------|
| 7/3         | 0.81               | 1.27                                 | 0.56 | 0.58  | 0.60/0.58   |
| 3/2         | 0.81               | 1.52                                 | 0.56 | 0.68  | 0.69/0.68   |
| 1/1         | 0.80               | 1.35                                 | 0.53 | 0.57  | 0.64/0.59   |
| 2/3         | 0.79               | 0.96                                 | 0.47 | 0.35  | 0.38/0.35   |
| 3/7         | 0.78               | 0.66                                 | 0.44 | 0.23  | 0.20/0.19   |
